# Supplementary material for: A 1-D coordination polymer based on a Mn40 octagonal super-structure
Source: Royal Society of Chemistry journal article supplement (doi:10.1039/c2cc36412c), 2012-12-19
Supplement: c2cc36412c.pdf [file c2cc36412c.pdf]

## ELECTRONIC SUPPORTING INFORMATION

### A 1-D coordination polymer based on a Mn<sub>40</sub> octagonal super-structure

Maria Manoli,<sup>a</sup> Ross Inglis,<sup>b</sup> Manolis J. Manos,<sup>a</sup> Giannis S Papaefstathiou,<sup>c</sup> Euan K. Brechin<sup>\*b</sup>,  
and Anastasios J. Tasiopoulos<sup>\*a</sup>

<sup>a</sup>Department of Chemistry, University of Cyprus, 1678 Nicosia, Cyprus; Fax: (+357) 22895451; Tel: (+357) 22892765; E-mail: [atasio@ucy.ac.cy](mailto:atasio@ucy.ac.cy)

<sup>b</sup>EaStCHEM School of Chemistry, The University of Edinburgh, West Mains Road, Edinburgh, EH9 3JJ, UK. Fax: +44 (0) 131-650-6453; Tel: +44(0) 131-650-7545; E-mail: [ebrechin@staffmail.ed.ac.uk](mailto:ebrechin@staffmail.ed.ac.uk)

<sup>c</sup>Laboratory of Inorganic Chemistry, Department of Chemistry, National and Kapodistrian University of Athens, Panepistimiopolis 157 71 Zografou, Greece.

#### Experimental Procedure

{(Et<sub>4</sub>N)[Mn<sub>21</sub>(μ<sub>3</sub>-O)<sub>6</sub>(μ<sub>3</sub>-OH)<sub>2</sub>(sao)<sub>12</sub>Br<sub>3</sub>(O<sub>2</sub>CMe)<sub>12</sub>(H<sub>2</sub>O)<sub>10</sub>(CH<sub>3</sub>CN)]Br<sub>2</sub>}<sub>n</sub> (**1**)<sub>n</sub>: 1,3-butanediol (H<sub>2</sub>bd) (0.502 ml, 0.505g, 5.60 mmol), saoH<sub>2</sub> (0.096 g, 0.70 mmol) and Et<sub>4</sub>NBr (0.147 g, 0.70 mmol) were added to a solution of MnBr<sub>2</sub>·4H<sub>2</sub>O (0.200 g, 0.70 mmol) and Mn(O<sub>2</sub>CMe)<sub>2</sub>·4H<sub>2</sub>O (0.171 g, 0.70 mmol) in 12 ml MeCN. The resulting green-brown solution was stirred for 1 hour, filtered off and layered with Et<sub>2</sub>O. X-ray quality crystals of **1**·10MeCN·H<sub>2</sub>O were formed after three weeks in ~30% yield. Vacuum – dried microcrystalline solid was analyzed as **1**·MeCN. Calcd. (found): C 32.71 (32.89), H 3.29 (3.35), N 4.77 (4.82).

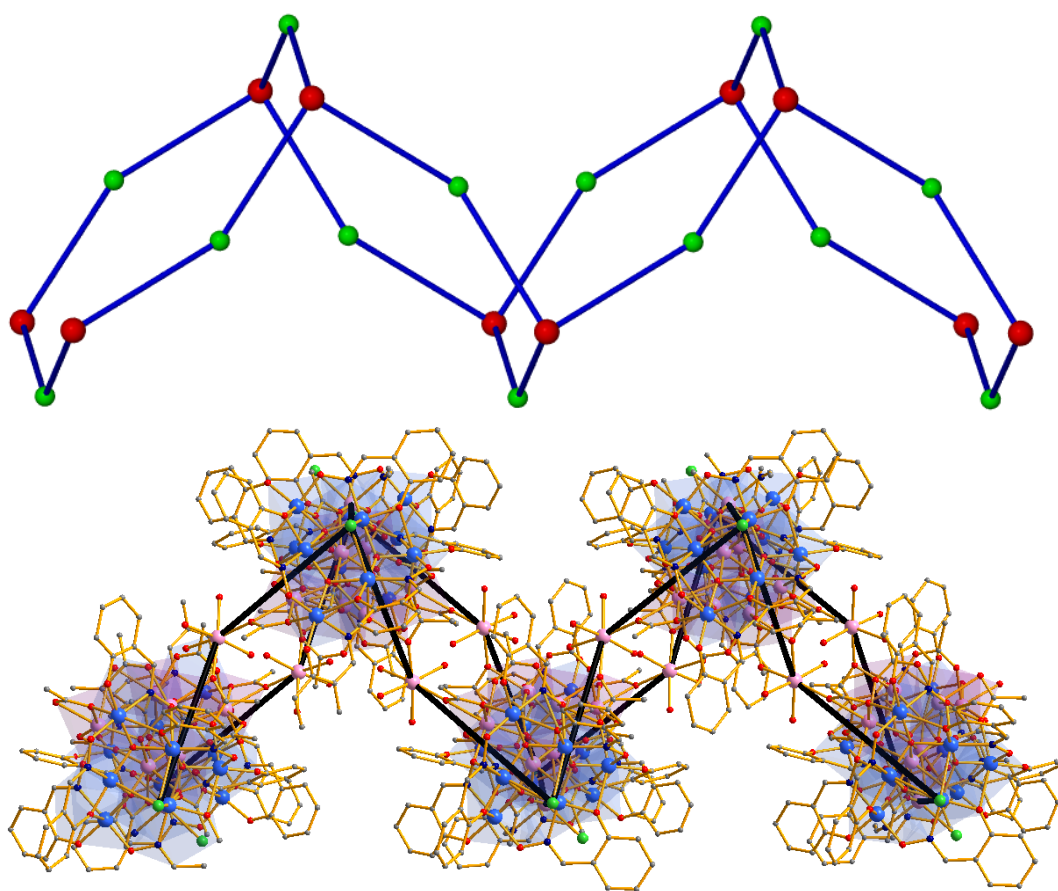

**Fig. S1.** A simplified (top) and ball and stick (bottom) representations of a part of the zig-zag chain of  $(\mathbf{1})_n$  from a viewpoint that emphasizes the connection of the  $\text{Mn}_{40}$  octagons to form the ribbon-shaped 1-D chain. The black solid line and metal ion polyhedra are included to emphasize the  $\text{Mn}_{40}$  superstructure; Colour scheme:  $\text{Mn}^{\text{III}}$ : blue;  $\text{Mn}^{\text{II}}$ : pink; O: red; Br: green; N: dark blue; C: gray. Hydrogen atoms have been omitted for clarity

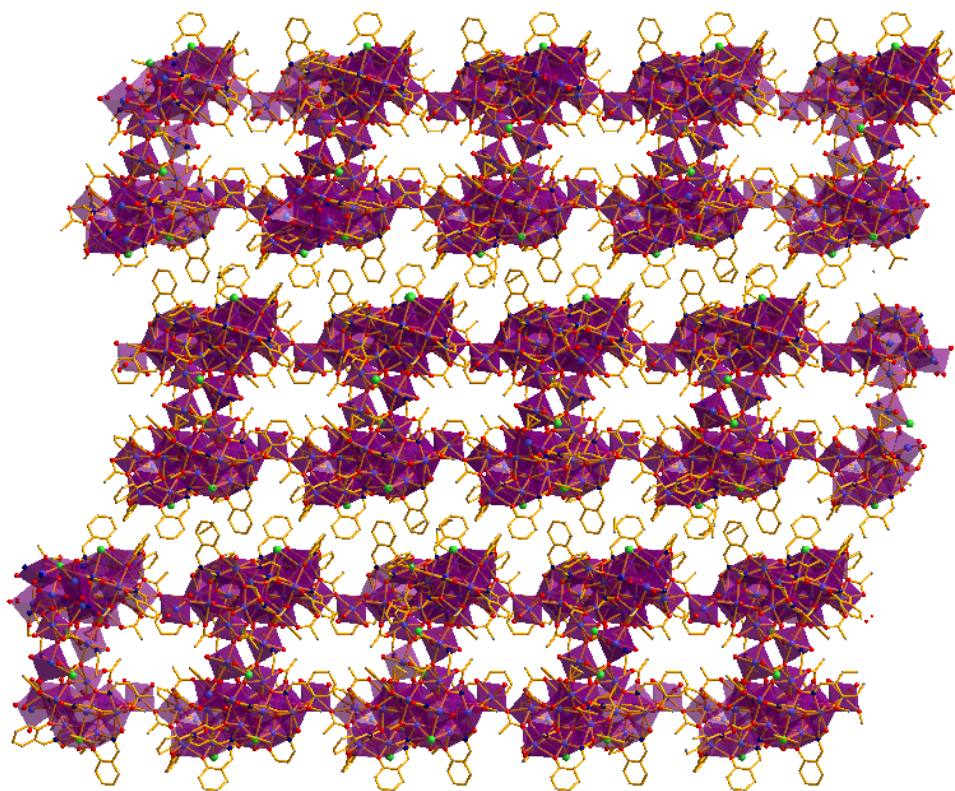

**Fig. S2.** Representation along the *b* axis of the packing of  $(\mathbf{1})_n$ . The metal ion polyhedra are included to emphasize the 1-D chains of  $(\mathbf{1})_n$  consisting of  $\text{Mn}_{40}$  octagons that run parallel in the crystal. Colour scheme: As in Fig. S1. Hydrogen atoms have been omitted for clarity.

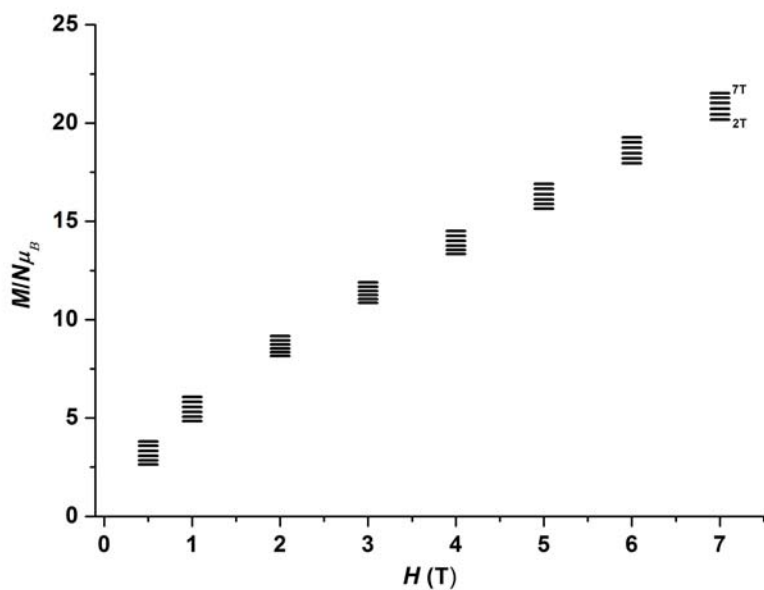

**Fig. S3.** Plot of magnetisation ( $M/N\mu_B$ ) versus field for **1**·MeCN.

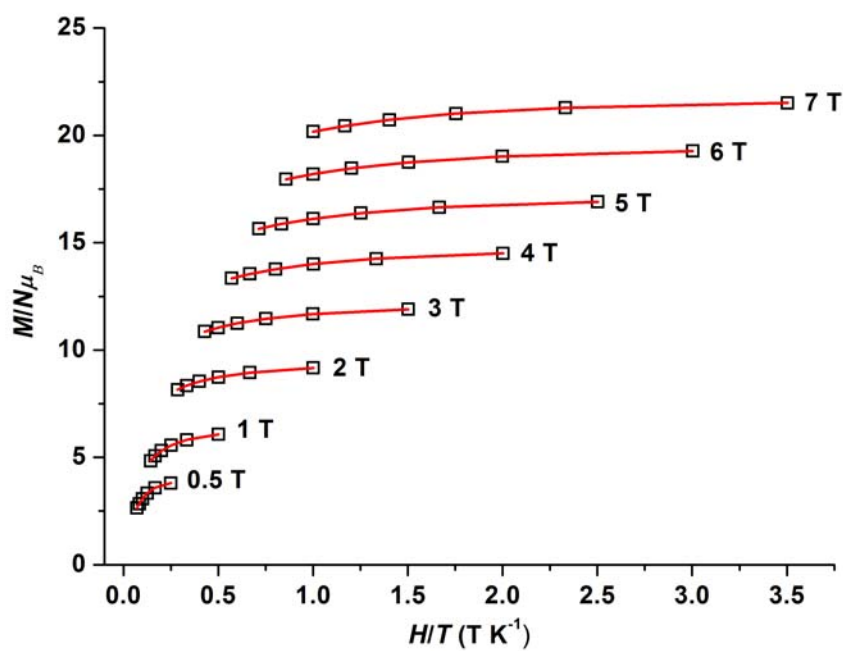

**Fig. S4.** Plot of  $M/N\mu_B$  versus  $H/T$  for **1**·MeCN. The solid red lines are a guide to the eye only.

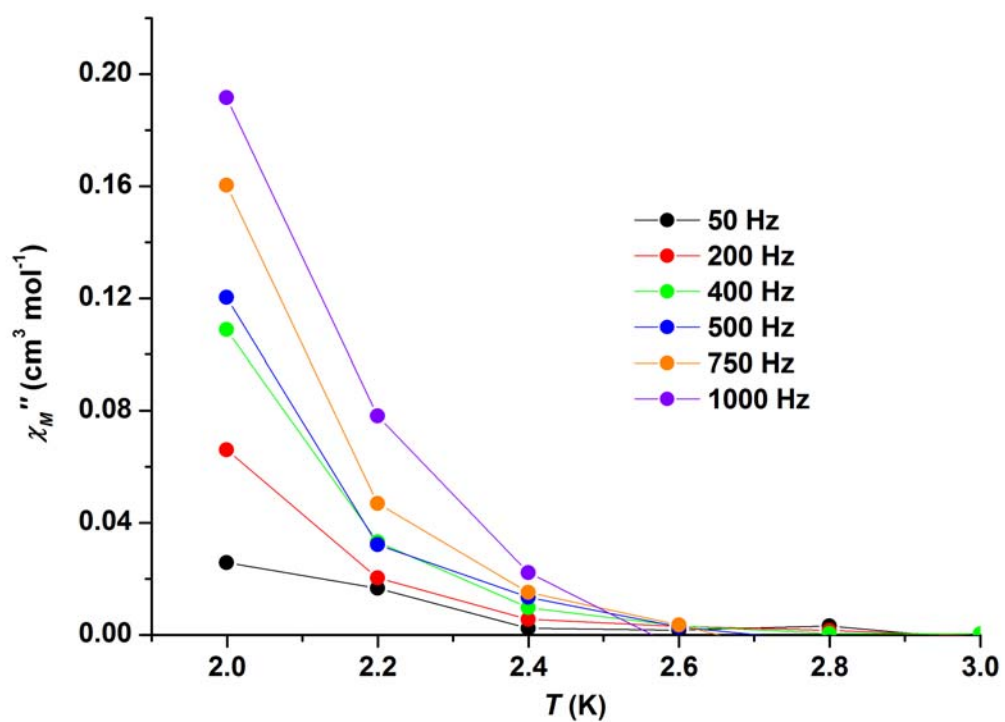

**Fig. S5.** Plot of the out-of-phase ( $\chi_M''$ ) ac susceptibility versus  $T$ , in the indicated frequency range for **1-MeCN**. The data was collected in a 3.5G ac field and zero-applied dc field. The presence of frequency-dependent signals is indicative of slow relaxation of the magnetisation.
